1 **N-acetyltransferase 2 genotypes amongst Zulu Speaking South Africans and isoniazid / N-**  
2 **acetyl-isoniazid pharmacokinetics during anti-tuberculosis treatment**

3

4 Thuli Mthiyane<sup>1</sup>, James Millard<sup>2,3,4</sup>, John Adamson<sup>4</sup>, Yusentha Balakrishna<sup>5</sup>, Cathy Connolly<sup>5</sup>,  
5 Andrew Owen<sup>6</sup>, Roxana Rustomjee<sup>1</sup>, Keertan Dheda<sup>7</sup>, Helen McIlleron<sup>8</sup>, Alexander S. Pym<sup>1,4</sup>.

6

7 1. South African Medical Research Council, Durban, South Africa

8 2. Wellcome Trust Liverpool Glasgow Centre for Global Health Research, Liverpool, UK

9 3. Institute of Infection and Global Health, University of Liverpool, Liverpool, UK

10 4. Africa Health Research Institute, Durban, South Africa

11 5. South African Medical Research Council, Biostatistics Department, Durban, South Africa

12 6. Department of Molecular and Clinical Pharmacology, University of Liverpool, United Kingdom

13 7. Lung Infection and Immunity Unit, Division of Pulmonology, Department of Medicine,

14 University of Cape Town, Cape Town, South Africa

15 8. Division of Clinical Pharmacology, Department of Medicine, University of Cape Town, Cape

16 Town, South Africa

17

18

19 KEYWORDS: Acetylation, N-acetyltransferase, isoniazid, tuberculosis, HIV, pharmacokinetics  
20 pharmacogenomics, drug metabolism

21

22 \* Corresponding author:

23 Name: Thuli Mthiyane

24 Institution: Medical Research Council, South Africa

25 Address: 1 Soutpansberg Road, Pretoria

26 Telephone: +27 12 3398507

27 Email: thuli.mthiyane@mrc.ac.za

28

29 **Abstract**

30 Background: Distribution of *N-acetyltransferase2* (*NAT2*) polymorphisms varies considerably  
31 among different ethnic groups. Information on *NAT2* single-nucleotide polymorphisms in South  
32 African population is limited. We investigated *NAT2* polymorphisms and their effect on  
33 isoniazid pharmacokinetics in Zulu black HIV-infected South Africans in Durban, South Africa.

34 Methods: HIV-infected participants with culture-confirmed pulmonary tuberculosis (TB) were  
35 enrolled from two unrelated studies. Culture-confirmed participants were genotyped for *NAT2*  
36 polymorphisms 282C>T, 341T>C, 481C>T, 857G>A, 590G>A and 803A>G using Life Technologies  
37 pre-validated Taqman assays (Life Technologies, Paisley, UK). Participants underwent sampling  
38 for determination of plasma isoniazid and *N*-acetylisoniazid concentrations.

39 Results: Amongst the 120 patients, 63/120 (52.5%) were slow metabolisers (*NAT2*\*5/\*5),  
40 43/120 (35.8%) had intermediate (*NAT2*\*5/12), and 12/120 (11.7%) had rapid genotype  
41 (*NAT2*\*4/\*11, *NAT2*\*11/12 and *NAT2*\*12/12). *NAT2* alleles in this study were \*4, \*5C, \*5D, \*5E,  
42 \*5J, \*5K, \*5KA, \*5T, \*11A, \*12A/12C and \*12M. *NAT2*\*5 was the most frequent allele (70.4%)  
43 followed by *NAT2*\*12 (27.9%). 34/40 had both PK results and *NAT2* genotyping results. The  
44 median area under the concentration-time-curve to infinity ( $AUC_{0-\infty}$ ) interquartile range (IQR)  
45 was 7.81 (5.87 – 16.83)  $\mu\text{g/ml/hr}$  and maximum concentration ( $C_{\text{max}}$ ) 3.14  $\mu\text{g/ml}$  (2.42 – 4.36)  
46  $\mu\text{g/mL}$ . Individual polymorphisms were not equally distributed, with some represented in small  
47 numbers. Genotype did not correlate with phenotype, rapid genotype showing higher  $AUC_{0-\infty}$   
48 than slow but not significant,  $p=0.43$ .

49 Conclusion: There was high prevalence of slow followed by intermediate then rapid acetylator  
50 genotypes. The poor concordance between genotype and phenotype suggests that other  
51 factors or genetic loci influence INH metabolism, and warrants further investigation in this  
52 population.

53

54 **Introduction:**

55 Tuberculosis (TB) remains a leading cause of global morbidity and mortality, with approximately  
56 10 million cases and 1.5 million deaths in 2018 (1). South Africa is a high TB burden country  
57 with an estimated 301,000 cases in 2018. The so-called ‘short-course’ treatment regimen  
58 recommended in international guidelines; consisting of 6 months of rifampicin and isoniazid,  
59 supplemented by pyrazinamide and ethambutol in the first 2 months, has remained largely  
60 unchanged for several decades. Whilst this regimen can achieve high relapse-free cure rates, a  
61 range of host and mycobacterial factors can influence treatment outcomes. There is increasing  
62 evidence that inter-individual variability in the pharmacokinetics (PK) of drugs within this  
63 regimen lead to heterogeneity in clinical outcomes(2, 3).

64

65 Pharmacogenomics describes one cause of PK variability due to polymorphisms in drug  
66 metabolising enzymes and transporters. During TB treatment, isoniazid is the paradigmatic  
67 case. Isoniazid is acetylated to its major metabolite, *N*-acetyl-isoniazid (AcINH), by the action of  
68 hepatic *N*-acetyltransferase 2 (*NAT2*). AcINH is subsequently rapidly hydrolysed to acetyl-  
69 hydrazine, which is also acetylated, to diacetyl-hydrazine, by the action of *NAT2*(4).  
70 Accumulated acetyl-hydrazine can be oxidised to form other, potentially hepatotoxic  
71 metabolites(4-6). Moreover, accumulated isoniazid can be metabolised by an alternative  
72 pathway where it is first hydrolysed to hydrazine, which has also been implicated in liver injury,  
73 before acetylation to acetyl-hydrazine, again by *NAT2*(4, 7). Hence, the activity of *NAT2* both  
74 dictates metabolism of isoniazid, and determines the availability of potentially hepatotoxic  
75 hydrazine and acetyl-hydrazine metabolites. Within the 870-base pair *NAT2* gene, a number of  
76 low-activity single nucleotide polymorphisms (SNPs) have been characterised. The *NAT2*  
77 genotype has been shown to determine the rate of acetylation by *NAT2* in several  
78 populations(8). Individuals homozygous for the wild-type alleles are characterised as ‘rapid’  
79 acetylators (RAs), those homozygous for low-activity SNPs as ‘slow’ acetylators (SAs) and  
80 heterozygotes as ‘intermediate’ acetylators (IAs)(9-13). SAs have a higher incidence of side-  
81 effects, particularly drug-induced hepatitis, during TB therapy, presumably due to higher levels  
82 of hepatotoxic metabolites (14-20). Amongst the first-line TB drugs isoniazid has the greatest

83 early bactericidal activity (EBA) and isoniazid PK parameters have been associated with rates of  
84 cure, sterilisation and acquired drug resistance(3, 21-27). A link between rapid acetylation and  
85 increased risk of poor treatment outcomes has been reported (28, 29).

86

87 *NAT2* genotype is known to differ amongst ethnic groups; with approximately 40-70% of  
88 Caucasians, Indians and African Americans characterised as SAs, versus only around 10% of  
89 Asian populations(30-42). *NAT2* genotype is not well characterised in the communities where  
90 TB is most prevalent, particularly in sub-Saharan Africa. South Africa has several black ethnic  
91 groups and few have been studied(43-45). Bach *et al* characterised 40% of a Zulu population as  
92 phenotypically slow acetylators but these findings have not been replicated, or informed by  
93 genotypic analysis(44). Moreover, South Africa has a high HIV prevalence and discordant  
94 relationships between *NAT2* genotype and isoniazid acetylator phenotype have been described  
95 amongst individuals living with HIV in other settings(46, 47).

96

97 We therefore characterised the relationship between *NAT2* genotype, isoniazid and AcINH PK  
98 and hepatotoxicity in a cohort of TB-HIV coinfecting individuals in Durban, KwaZulu-Natal, South  
99 Africa.

100

101

## 102 **Methods:**

### 103 **Participants, study treatment and sample collection**

104 Participants from two unrelated PK studies were included(48, 49). Both studies recruited black,  
105 Zulu-speaking adults living with HIV from KwaZulu-Natal, South Africa, between March 2007  
106 and April 2010. Study 1 entitled “Bioavailability of the fixed dose formulation Rifafour  
107 containing isoniazid, rifampicin pyrazinamide, ethambutol and the WHO recommended first  
108 line anti-retroviral drugs zidovudine, lamivudine, efavirenz administered to new TB patients at  
109 different levels of immunosuppression.”. The results of this study have been previously  
110 reported (49). As shown in Table 2, for the purposes of this analysis, we used samples collected  
111 on day 1 of the study after an overnight fast, at pre-dose, 1, 2, 4, 5, 6, 8, and 12 hours post

112 dose, with samples analysed for INH and AcINH for 60 participants with microbiologically  
113 proven pulmonary TB (positive sputum culture or smear) who received a standard first line TB  
114 regimen consisting of a FDC as described above . The INH dose was 150 mg, 225 mg, 300 mg  
115 and 375 mg per day for participants with weight 30 -37 kg, 38– 54 kg, 55 – 70 kg, and 70 kg and  
116 above, respectively, as per WHO guidelines(50). Each participant had blood collected on a  
117 paxgene tube for NAT2 genotyping. In addition, genotyping was performed on a further 20  
118 participants without TB who were recruited to this study (49).

119

120 Study 2, entitled “Pharmacokinetics of Rifabutin Combined with Antiretroviral Therapy in the  
121 Treatment of Tuberculosis Patients with HIV Infection in South Africa”, was a randomised  
122 controlled trial of two different rifabutin doses co-administered with lopinavir/ritonavir-based  
123 antiretroviral therapy (51, 52). Participants initially received 6 weeks of standard intensive  
124 phase treatment, followed by 2 weeks with rifabutin 300mg daily replacing rifampicin. After 2  
125 weeks of the continuation phase during which participants received only isoniazid and rifabutin  
126 (both 300mg daily) PK sampling was carried out. Individuals were fasted overnight, and a  
127 standard hospital breakfast served 2 hours after drug ingestion. Sampling was conducted pre-  
128 dose and at 2, 3, 4, 5, 6, 8, and 12 and 24 hours after drug intake, with samples analysed for  
129 isoniazid and AcINH for 40 participants. NAT2 genotyping was performed on 40 participants  
130 with 34 participants having both PK sampling and genotyping.

131

132 All participants receiving anti-TB treatment in both studies were given pyridoxine for peripheral  
133 neuropathy prophylaxis and patients with CD4 counts below 200 cells/mm<sup>3</sup> received  
134 cotrimoxazole. No participants were on antiretrovirals at the time of PK sampling. Both studies  
135 were approved by the South African Medicines Control Council (SAMCC), Biomedical Research  
136 Ethics Committee (BREC) of the University of KwaZulu-Natal (Study 1- E294/05; Study 2-  
137 BFC011/07) and the South African Medical Research Council (SAMRC) ethics committee. Study  
138 one was also approved by the WHO Ethics Research Ethics Committee. Written informed  
139 consent was obtained from all participants.

140

## 141 **NAT2 genotype procedures**

142 Total Genomic DNA was isolated from whole blood using the QIAamp DNA mini kit (Qiagen,  
143 Crawly, UK) according to manufacturer's instructions. Participants were genotyped, using the  
144 DNA Engine Chromo4 system (Bio-Rad Laboratories, Hercules, CA) and Opticon Monitor v.3.1  
145 software (Bio-Rad Laboratories), for 6 NAT2 SNPs; 282C>T, 341T>C, 481C>T, 857G>A, 590G>A  
146 and 803A>G using Life Technologies pre-validated probe-based Taqman assays as per  
147 manufactures instructions (Life Technologies, Paisley, UK). Each participant sample was  
148 analysed in duplicate.

149

## 150 **Haplotype assignment and acetylator genotype inference**

151 Haplotype assignment from probe-based SNP data is poorly described in African populations.  
152 We elected to employ an unbiased PHASE analysis, which takes the dataset as a whole to assign  
153 the most likely haplotype for each individual, alongside a probability for this assignment (53,  
154 54). Haplotype for each individual and acetylator genotype for each haplotype were defined as  
155 per the NAT gene nomenclature committee (55). Individuals with two rapid alleles were defined  
156 as RAs, those with two slow alleles as SAs and those with one fast and one slow allele as IAs.

157

## 158 **Isoniazid and *N*-acetyl-isoniazid PK and phenotype inference**

159 Blood samples were collected and placed on ice immediately, before centrifugation within 60  
160 minutes, immediate separation and storage of plasma at -70°C until analysis. Concentrations of  
161 isoniazid, AcINH and a 6-aminonicotinic acid internal control were quantified using validated  
162 high-performance liquid chromatography and tandem mass spectrometry (HPLC-MS/MS).  
163 Sample preparation included a protein precipitation with acetonitrile and subsequent dilution  
164 with water. Analytes were chromatographically separated using a Waters Exterra C18, 3.5µm,  
165 50mm x 2.1mm column and detected using the AB Sciex 5500 Q-Trap mass spectrometer. All  
166 analytes were analysed isocratically with an acetonitrile/water/0.1% formic acid mobile phase.  
167 Isoniazid, AcINH and the internal standard were analysed at mass transitions of the precursor  
168 ions (m/z) 137.9, 180.1 and 138.7 to the product ions (m/z) 66.0, 78.6 and 50.9, respectively.  
169 Chromatographic data acquisition, peak integration and quantification of analytes was

170 performed using Analyst® software version 1.5.2. We constructed time-concentration curves in  
171 the *PK* package in *R* for windows (version 3.5.1). We characterised the isoniazid and AcINH PK  
172 parameters maximum concentration ( $C_{\max}$ ), time to maximum concentration ( $T_{\max}$ ), area under  
173 the concentration curve from zero to infinity ( $AUC_{0-\infty}$ ), apparent oral clearance (CL) and  
174 elimination half-life and compared  $C_{\max}$  to published efficacy targets (56).  $AUC_{0-\infty}$  was calculated  
175 using the trapezoid rule, apparent oral clearance estimated by dose /  $AUC_{0-\infty}$  and elimination  
176 half-life by regression analysis of  $\log_{10}$  concentrations of the terminal exponent of elimination.  
177 We analysed the ratio of  $\log_{10}$  AcINH to  $\log_{10}$  isoniazid at two and four hours to assess  
178 acetylation phenotype.

179

180 Sample processing and HPLC-MS was initially conducted in 2010 for Study 1. Samples remained  
181 in storage and were later moved to a new storage facility before they were shipped to a  
182 different laboratory for determination of isoniazid and AcINH concentrations as above (having  
183 previously only had isoniazid concentrations determined). To confirm the Integrity of these  
184 samples we compared the isoniazid  $AUC_{0-\infty}$  of the current analysis with that previously reported  
185 on the same samples analysed in 2010.

186

### 187 **Statistical methods**

188 All data were entered in Epidata and transferred to either Stata (version 14) or *R* for windows  
189 (version 3.5.1) for statistical analysis. Demographic characteristics were presented as  
190 frequencies and percentages for categorical variables, and as means with standard deviations  
191 for continuous variables. Descriptive PK data was described as median and inter-quartile  
192 ranges.  $C_{\max}$  and  $AUC_{0-\infty}$  were log-transformed prior to comparison between genotypes. PK  
193 parameters were compared, by genotype, using the Wilcoxon rank-sum test or Kruskal–Wallis  
194 test.

195

### 196 **Hepatic adverse events**

197 Hepatic adverse events were defined as elevated alanine transaminase (ALT) and  
198 aspartate transaminase (AST), elevated alkaline phosphatase and elevated total bilirubin,

199 graded as per Division of AIDS toxicity table for grading severity of HIV-positive adult adverse  
200 events.

201

## 202 **Results:**

### 203 **Participant characteristics**

204 One hundred and twenty-two individuals living with HIV participating in two PK studies were  
205 included in the study. Eighty participants in study 1 were included in the *NAT2* genotyping  
206 analysis and 60 in the PK analysis (with 58 individuals having both PK and genotype data), while  
207 40 participants in study 2 were included in the PK analysis and 40 participants included in *NAT2*  
208 genotyping analysis (with 34 individuals having both PK and genotype data). Key characteristics  
209 are outlined in table 1. Participants in study 1 included 60 with pulmonary TB and HIV co-  
210 infection; 40 with CD4 count >200 cells/mm<sup>3</sup> and, 20 with CD4 count <200 cells/mm<sup>3</sup> as well as  
211 20 participants living with HIV and without TB (who contributed only genotype data). All 40  
212 participants in study 2 had TB and HIV coinfection, with a CD4 count of 200 cells/mm<sup>3</sup> or below.  
213 In the combined studies, 66.7% of participants had CD4 counts <200 cells/mm<sup>3</sup> and 33.3% had  
214 CD4 count >200 cells/mm<sup>3</sup>. The Median age was 33.1 years (IQR 18-53). Only 15 (12.5%) of  
215 patients had a BMI < 18.86 kg/m<sup>2</sup>.

216

### 217 ***NAT2* genotype and deduced phenotype**

218 One hundred and twenty participants (80 from study 1 and 40 from study 2) were genotyped.  
219 Allele and haplotype frequencies and deduced phenotypes are outlined in tables 2-5. We  
220 identified 12 different alleles in the population. The most common allelic group was *NAT2\*5*  
221 (70.4%) followed by *NAT2\*12* (27.9%). From the *NAT2\*5* group *NAT2\*5C* (21.3%), *NAT2\*5J*  
222 (17.5%), *NAT2\*5D* (14.6%) and *NAT2\*5K* (10.4%) were the most common. The *NAT2\*12* group  
223 was predominantly *NAT2\*12C*. The deduced phenotype was 11.7% rapid, 35.8% intermediate  
224 and 52.5% slow.

225

### 226 **Isoniazid and *N-acetyl*-isoniazid PK**



227 As above, to assess sample integrity for Study 1 we compared the  $AUC_{0-\infty}$  of the current analysis  
228 with that previously reported on the same samples analysed in 2010. The median (IQR)  $AUC_{0-\infty}$   
229 was 5.53 (3.63 – 9.12), processed at University of Cape Town (UCT) in 2009 and 5.70 (3.85 –  
230 7.94), processed at Africa Health Research Institute (AHRI) laboratory in 2014, suggesting that  
231 the integrity of the samples was maintained for isoniazid, but cannot be confirmed for AcINH.

232  
233 Study 1 showed rapid absorption, with a median (IQR) isoniazid  $T_{max}$  of 1 hr(1 -2). Isoniazid  
234 exposure was variable amongst individuals with median (IQR)  $C_{max}$  1.47 (1.14 – 1.85)  $\mu\text{g}/\text{ml}$  and  
235  $AUC_{0-\infty}$  5.53 (3.63 – 9.12)  $\mu\text{g}\cdot\text{h}/\text{ml}$ . Median (IQR) elimination half-life was relatively slow at 2.27  
236 (1.69 – 3.56) h. We compared these isoniazid PK measures to published targets; 98.28% (57/58)  
237 failed to attain the minimum 2-hour plasma concentration target of 3  $\mu\text{g}/\text{ml}$  (56). PK  
238 parameters by genotype are shown in table 8(A), unexpectedly median half-life was slowest,  
239 apparent oral clearance lowest and  $AUC_{0-\infty}$  highest amongst genotypically rapid acetylators,  
240 with the reverse true for genotypically slow acetylators, although none of these differences was  
241 statistically significant. Similarly, there were no statistically significant differences by genotype  
242 for AcINH  $C_{max}$ , elimination half-life or  $AUC_{0-\infty}$ . Median isoniazid and AcINH time-concentration  
243 curves are given in Figure 1(A).

244  
245 Absorption was rapid in Study 2, with a median INH  $T_{max}$  of 2 hrs. INH exposure was also  
246 variable amongst individuals with median (IQR)  $C_{max}$  3.14  $\mu\text{g}/\text{ml}$  (2.39 – 4.34) and  $AUC_{0-\infty}$  10.76  
247  $\mu\text{g}\cdot\text{hr}/\text{ml}$  (8.24 – 28.96  $\mu\text{g}/\text{ml}$ ). Median elimination half-life was 2.62hr (2.26 – 4.07). Again, we  
248 compared these INH PK measures to published PK targets; 47.5% (19/40) failed to attain the  
249 minimum 2-hour plasma concentration target of 3  $\mu\text{g}/\text{ml}$ . PK parameters by genotype are  
250 shown in table 8(B). For both isoniazid and AcINH and across the PK parameters;  $C_{max}$ ,  $AUC_{0-\infty}$   
251 and elimination half-life, variability (both range and IQR) were increased amongst those  
252 genotyped as SAs. Again however, there were no statistically significant differences between  
253 these PK parameters by genotype. Median isoniazid and AcINH time-concentration curves are  
254 given in Figure 1(B).

255

256 For both studies we calculated the  $\log_{10}$  AcINH:  $\log_{10}$  isoniazid ratio, as a measure of  
257 acetylation, at two and four hours post-dose and analysed this ratio by genotype (figure2 & 3).  
258 In both studies we saw no statistically significant difference in ratios between genotypes at  
259 either two or four hours. In Study 2 we again saw increased variability in this metric amongst  
260 those genotyped as SAs.

261

### 262 **Hepatic adverse events**

263 There were no grade 3 and 4 hepatic adverse events in Study 1 and only 1 grade 4 hepatic  
264 event was reported from the only participant with rapid genotype in Study 2. Although there  
265 were more grade 1 hepatic adverse events among the slow genotype participants, as shown in  
266 table 9, the difference was not statistically significant between genotypes;  $p=0.203$  in Study 1,  
267 and  $0.276$  in Study 2.

268

### 269 **Discussion:**

270 We investigated the *NAT2* genotype, isoniazid and AcINH PK of black Zulu South Africans living  
271 with HIV from Durban and surrounding areas. We found that most individuals were of SA  
272 (52.5%) or IA (35.8%) genotype, with only a small number of RA genotype (11.7%). The  
273 proportions of the deduced acetylator phenotypes in our population was broadly similar to  
274 other African and Caucasian populations (36, 43, 57, 58) but differed from those previously  
275 reported from within other black ethnic groups within Southern Africa. For example, Werely *et*  
276 *al* found that IA genotypes dominated in the Xhosa cohort, with SAs only 30% (45). Our results  
277 were comparable to a recent Study by Naidoo et al. in patients from the same geographic area  
278 reported 34% SA, 43% IA and 18% RA (59).

279

280 There was a high prevalence of the *NAT2\*5* allelic group in our population, accounting for the  
281 slow acetylator genotype. In well studied Caucasian and Asian populations, four variants;  
282 *NAT2\*4* (wild type, rapid), *NAT2\*5B*, *NAT2\*6A*, and *NAT2\*7B* (all slow), account for most *NAT2*  
283 alleles. In Asian populations there are generally a higher proportion of wild type *NAT2\*4* alleles  
284 and few *NAT2\*5B* alleles, and this difference largely accounts for the much lower prevalence of

285 RAs in non-Asian populations. Consistent with other studies in Sub-Saharan African populations,  
286 the wild-type *NAT\*4* allele was far less prevalent and variant alleles were far more diverse in  
287 our Study. In our population, the *NAT2\*5B* allele was relatively rare in comparison to two  
288 studies in the black population from Western Cape and North West Province. (45, 60).  
289 However, in contrast to these populations, there were a diversity of other *NAT2\*5* alleles,  
290 including a much higher prevalence of the rare *NAT2\*5J* allele (17.5%) and the poorly  
291 characterised *NAT2\*5K* allele (10.4%). The *NAT2\*6A* and *NAT2\*7B* alleles, common in  
292 Caucasian and Asian populations, were not seen in our cohort. In Caucasian and Asian  
293 populations, rapid *NAT2\*12* alleles are rarely seen, where as in populations in sub-Saharan  
294 Africa the *NAT2\*12A* allele is reported at much higher frequencies(35). In our Study the  
295 *NAT2\*12A* allele did indeed comprise 5.8% of alleles seen but we saw a much higher frequency  
296 of the *NAT2\*12C* allele (21.2%), in contrast to other Southern African cohorts(10, 45, 60, 61).

297

298 Isoniazid  $C_{max}$  and  $AUC_{0-\infty}$  demonstrated considerable variability between individuals in both  
299 studies and almost all participants in Study 1 and almost half of the participants in Study 2 had a  
300  $C_{max}$  below the lower limit of the target range(56). Low isoniazid concentrations during TB  
301 treatment are concerning because it is postulated they may lead to poorer treatment  
302 outcomes, or the generation of isoniazid resistance, the likely first step in the evolution of  
303 multi-drug resistant TB (MDR TB). However, the evidence for either of these concerns is mixed  
304 and in this setting the prevalence of INH mono-resistance is relatively low.

305

306 There was a marked difference in PK measures between the two studies analysed, with Study 1  
307 having much lower measures than Study 2. There are several reasons that could have  
308 contributed to this difference. The difference in isoniazid dosing could explain the lower PK  
309 measures, where Study 1 used the FDC dosing as per WHO recommended weight bands,  
310 leading to almost half the participants receiving doses <300 mg, as previously reported(49). All  
311 participants in Study 2 received 300 mg doses of isoniazid irrespective of weight. Although the  
312 samples of Study 1 did not appear to deteriorate during the 5 years between first analysis and  
313 subsequent analyses for this study, differences in processing and storage between the studies

314 cannot be excluded. Figure 3 shows the INH and AcINH at different time points. Based on this,  
315 the phenotype of the study participants is generally more intermediate/rapid than what the  
316 predominant slow genotype suggests, which is in contrast to other studies reporting HIV  
317 patients having a tendency towards slow phenotype (62).

318

319 We identified no statistically significant difference by *NAT2* genotype in a variety of PK  
320 measures, hence in this cohort we found poor correlation between *NAT2* genotype and  
321 phenotypic acetylation of isoniazid. Previous studies in other populations have shown good  
322 correlation between *NAT2* genotype and isoniazid PK, suggesting that *NAT2* genotyping could  
323 be used as a parsimonious way to risk-stratify patients and personalise dosing of isoniazid in an  
324 attempt to maximise efficacy whilst minimising toxicity. There are significant practical  
325 difficulties to implementing these approaches in this setting, but our data suggest that in this  
326 population *NAT2* genotyping will not be helpful in guiding TB therapy. A lack of concordance  
327 between genotypic and phenotypic measures of INH acetylation has been reported previously  
328 in HIV positive cohorts (63) (64). It is likely that in this cohort, as in others, other non-genetic  
329 factors are more or equally important than *NAT2* genotype. Jones et al found that infection  
330 with HIV or stage of HIV infection may alter Phase I and II drug metabolising enzyme (DME)  
331 activity in their study on 17 HIV infected participants at different levels of immunosuppression  
332 (65). They found that HIV infection was related to an increase in variability of these DMEs.  
333 Whilst additional pathways, aside from *NAT2* genotype, have been implicated in hepatotoxicity  
334 of isoniazid-containing TB treatment regimens, it is not clear that these pathways alter isoniazid  
335 PK and thus could account for the lack of genotypic and phenotypic concordance in this study.

336

337 Although there were more hepatic adverse events among the SA, there was no statistical  
338 association between genotype and hepatotoxicity in the two studies, with only 1 patient who  
339 was a RA having a grade 4 hepatic adverse event and 2 others who were IA having grade 3  
340 hepatic adverse events.

341

342 In our study, participants received pyridoxine and cotrimoxazole with the ATT in Study 2, but  
343 not in Study 1 as we used the samples collected on day 1 for this analysis when only ATT was  
344 given. As both INH and sulfamethoxazole are inhibitors of CYP2C9, this could be one of the  
345 reasons for the variations noted. INH also inhibits CYP3A4, which is induced by rifampicin, this  
346 interaction has not proven significant except when it relates to hepatotoxicity (66, 67). That the  
347 combination of INH and rifampicin leads to an increased risk of hepatotoxicity, has been  
348 reported in other studies. In our Study 2, isoniazid was given with Rifabutin which is a less  
349 potent hepatic enzyme inducer, which therefore should have less interaction with INH (68).  
350 Considering the limited effect on hepatotoxicity, the effect of CYP2E1 was not evident in our  
351 study. We cannot confirm or exclude the effect of these CYP450 enzymes on INH metabolism in  
352 these participants.

353

354 In our study samples were stored at  $-80^{\circ}$  Celsius and loss of compound due to storage would  
355 have been minimal (69), although studies have not reported on plasma samples stored longer  
356 than 5 weeks, nor sample integrity for the metabolite, AcINH.

357

### 358 **Conclusion**

359 Amongst black Zulu TB-HIV coinfecting South African patients, most had slow or intermediate  
360 *NAT2* genotype. There was a diversity of specific *NAT2* alleles of a pattern differing from  
361 previously studied cohorts in other settings. Despite the rarity of rapid acetylator genotypes,  
362 INH PK was variable and a substantial proportion of individuals failed to attain minimum  
363 efficacy targets. Importantly *NAT2* genotype did not explain PK variability in this cohort or the  
364 low  $C_{max}$ , which suggests that other factors could be influencing isoniazid bioavailability and  
365 metabolism, which require further elucidation.

366

### 367 **Acknowledgements**

368 The study was sponsored by the Special Programme for Research and Training in Tropical  
369 Diseases, World Health Organization and United States Agency for International Development  
370 (USAID, Umbrella grant no. AAG-G-00-99-00005). The European and Developing Countries

371 Clinical Trials Partnership (EDCTP) supplied supplementary funding of the PhD. We also  
372 acknowledge the generous donations of antiretroviral drugs from two major pharmaceutical  
373 companies, GlaxoSmithKline (UK) and Merck (USA), without which the study would not have  
374 been conducted. Study 2 was funded by Agence Nationale de Recherche Sur le Sida et les  
375 Hépatites Virales. Wellcome Trust (203919/Z/16/Z) supported one of the authors. These  
376 sponsors had nothing to do with study conduct. We would also like to thank the study staff for  
377 their hard work and patients for their involvement in this study.

378

379

380

381

382 **List of Tables**

383

384 **Table 1:** Demographic characteristics

385

386 **Table 2:** Pharmacokinetic time points and dosing

387

388 **Table 3:** NAT2 diplotypes, genotypes and deduced phenotype in the study group.

389

390 **Table 4:** Frequency of NAT2 alleles.

391

392 **Table 5:** Frequency of NAT2 haplotypes.

393

394 **Table 6:** Frequency distribution of NAT2 genotypes and deduced phenotype in the study group.

395

396 **Table 7:** Overall isoniazid and N-acetyl-isoniazid PK

397 **Table 8 (A):** Study 1 PK parameters by genotype

398 **Table 8 (B):** Study 2 PK parameters by genotype

399 **Table 9:** Adverse events for study 1 and 2

400

401

402 **List of figures**

403

404 **Figure 1(A):** Study 1 median isoniazid (INH) and N-acetyl-INH (AcINH) concentrations over time,  
405 n=58. Shaded area: IQR.

406

407 **Figure 1(A):** Study 2 median isoniazid (INH) and N-acetyl-INH (AcINH) concentrations over time,  
408 n=34. Shaded area: IQR.

409

410

411 **Figure 2:** Boxplots for study 1

412

413 **Figure 3:** Box plots for study 2

414

415

| <b>Table 1: Demographic characteristics</b> |                       |                       |                        |
|---------------------------------------------|-----------------------|-----------------------|------------------------|
|                                             | <b>Study 1 (n=80)</b> | <b>Study 2 (n=40)</b> | <b>Overall (n=120)</b> |
| Demographics                                |                       |                       |                        |
| Median age (range)                          | 33 (18-48)            | 33.6 (24-53)          | 33.1 (18-53)           |
| Male sex (%)                                | 36 (45%)              | 24 (60.0%)            | 60 (50%)               |
| Zulu ethnicity (%)                          | 80 (100%)             | 40 (100%)             | 120 (100%)             |
|                                             |                       |                       |                        |
| Mean weight (SD)                            | 58.7 (11.9)           | 58.9 (9.7)            | 58.7 (11.2)            |
| Mean BMI (SD)                               | 23.0 (5.2)            | 23.1 (3.9)            | 23.1 (4.8)             |
| BMI <18.5 (%)                               | 13 (16.3%)            | 2 (5.0%)              | 15 (12.5%)             |
|                                             |                       |                       |                        |
| Median CD4 (range)                          | 210.5 (10-500)        | 128 (61 – 199)        | 161 (10-500)           |
| CD4 < 200 (%)                               | 40 (50%)              | 40 (100%)             | 80 (66.7%)             |

416

417

418



419 **Table 2 PK time points and dosing**  
 420 **Table 2 Pharmacokinetic time points and dosing**  
 421

| Study               | Schedule of pharmacokinetic sampling (day of TB treatment)                                                                        | Treatment                                                                                                                                                                                                                                                                                                                                                                                                                                                                                                                                                                                                                                                                           |                     |  |  |  |       |       |       |      |           |           |           |           |
|---------------------|-----------------------------------------------------------------------------------------------------------------------------------|-------------------------------------------------------------------------------------------------------------------------------------------------------------------------------------------------------------------------------------------------------------------------------------------------------------------------------------------------------------------------------------------------------------------------------------------------------------------------------------------------------------------------------------------------------------------------------------------------------------------------------------------------------------------------------------|---------------------|--|--|--|-------|-------|-------|------|-----------|-----------|-----------|-----------|
| Study 1             | Days 1; with sampling pre-dose and at 1, 2, 4, 6, 8, 12 hours after the dose.                                                     | 4 drug FDC formulation (EMB/ RMP/ INH/ PZA 275/150/75/400 mg) dosed daily by weight band: <table border="1" data-bbox="824 499 1511 674"> <thead> <tr> <th colspan="4" data-bbox="824 499 1511 552">Weight in kilograms</th> </tr> <tr> <th data-bbox="824 552 1008 611">30-37</th> <th data-bbox="1008 552 1192 611">38-54</th> <th data-bbox="1192 552 1375 611">55-70</th> <th data-bbox="1375 552 1511 611">&gt; 70</th> </tr> </thead> <tbody> <tr> <td data-bbox="824 611 1008 674">2 tablets</td> <td data-bbox="1008 611 1192 674">3 tablets</td> <td data-bbox="1192 611 1375 674">4 tablets</td> <td data-bbox="1375 611 1511 674">5 tablets</td> </tr> </tbody> </table> | Weight in kilograms |  |  |  | 30-37 | 38-54 | 55-70 | > 70 | 2 tablets | 3 tablets | 4 tablets | 5 tablets |
| Weight in kilograms |                                                                                                                                   |                                                                                                                                                                                                                                                                                                                                                                                                                                                                                                                                                                                                                                                                                     |                     |  |  |  |       |       |       |      |           |           |           |           |
| 30-37               | 38-54                                                                                                                             | 55-70                                                                                                                                                                                                                                                                                                                                                                                                                                                                                                                                                                                                                                                                               | > 70                |  |  |  |       |       |       |      |           |           |           |           |
| 2 tablets           | 3 tablets                                                                                                                         | 4 tablets                                                                                                                                                                                                                                                                                                                                                                                                                                                                                                                                                                                                                                                                           | 5 tablets           |  |  |  |       |       |       |      |           |           |           |           |
| Study 2             | Day 63 (after 2 weeks on continuation phase RBN+INH) with sampling pre-dose and 2, 3, 4, 5, 6, 8, 12 and 24 hours after the dose. | Enrolment – week 6: standard weight band based treatment with RMP, INH, PZA and EMB (as in study 1)<br>Week 6 & 7: RMP replaced with RFB 300 mg daily<br>week 8 & 9: RFB 300 mg/INH 300 mg                                                                                                                                                                                                                                                                                                                                                                                                                                                                                          |                     |  |  |  |       |       |       |      |           |           |           |           |

422 PK= pharmacokinetics; RMP=rifampicin; PZA=pyrazinamide; EMB=ethambutol;  
 423 FDC=fixed dose combination

424  
 425  
 426

427

**Table 3. NAT2 diplotypes and genotypes and deduced phenotype in the study group.**

| Observed Diplotypes† | n  | Genotype | Phenotype    |
|----------------------|----|----------|--------------|
| -20000               | 1  | 5D/5K    | SLOW         |
| 000020               | 1  | 12A/12A  | RAPID        |
| 001000               | 1  | 4/11A    | RAPID        |
| 001020               | 6  | 12A/12C  | RAPID        |
| 002010               | 2  | 11A/12C  | RAPID        |
| 002020               | 4  | 12C/12C  | RAPID        |
| 01-020               | 1  | 5C/12C   | INTERMEDIATE |
| 010010               | 1  | 5D/12A   | INTERMEDIATE |
| 010020               | 2  | 5C/12A   | INTERMEDIATE |
| 010110               | 2  | 5E/12A   | INTERMEDIATE |
| 011010               | 3  | 5D/12C   | INTERMEDIATE |
| 011020               | 15 | 5C/12C   | INTERMEDIATE |
| 011110               | 3  | 5E/12C   | INTERMEDIATE |
| 0200-0               | 1  | 5C/5D    | SLOW         |
| 020000               | 1  | 5D/5D    | SLOW         |
| 020010               | 10 | 5C/5D    | SLOW         |
| 020020               | 3  | 5C/5C    | SLOW         |
| 020100               | 3  | 5D/5E    | SLOW         |
| 020110               | 1  | 5C/5E    | SLOW         |
| 110010               | 1  | 5K/12A   | INTERMEDIATE |
| 110110               | 1  | 5K/12C   | INTERMEDIATE |
| 111010               | 5  | 5K/12C   | INTERMEDIATE |
| 111020               | 1  | 5T/12C   | INTERMEDIATE |
| 111110               | 6  | 5J/12C   | INTERMEDIATE |
| 120000               | 7  | 5D/5K    | SLOW         |
| 120010               | 5  | 5C/5K    | SLOW         |
| 120011               | 1  | 5C/5KA   | SLOW         |
| 120020               | 1  | 5C/5T    | SLOW         |
| 120100               | 7  | 5D/5J    | SLOW         |
| 120110               | 8  | 5C/5J    | SLOW         |
| 120200               | 1  | 5E/5J    | SLOW         |
| 211020               | 1  | 5T/12M   | INTERMEDIATE |
| 211110               | 1  | 5J/12M   | INTERMEDIATE |
| 220001               | 1  | 5K/5KA   | SLOW         |
| 220100               | 4  | 5J/5K    | SLOW         |
| 220110               | 1  | 5J/5T    | SLOW         |
| 2202-0               | 1  | 5J/5J    | SLOW         |
| 220200               | 6  | 5J/5J    | SLOW         |

†Observed diplotypes are shown as the number of mutations identified in each individual for each SNP. 0 = wild type, 1 = heterozygous, 2 = homozygous, - = blank. The SNP order is 282, 341, 481, 590, 803, 857.

428

429

| <b>Table 4. Frequency of NAT2 alleles in the study group.</b> |            |            |
|---------------------------------------------------------------|------------|------------|
| <b>Allele designation</b>                                     | <b>n</b>   | <b>%</b>   |
| NAT2*4                                                        | 1          | 0.4        |
| NAT2*5                                                        | 169        | 70.4       |
| NAT2*11                                                       | 3          | 1.3        |
| NAT2*12                                                       | 67         | 27.9       |
| <b>Total</b>                                                  | <b>240</b> | <b>100</b> |

430

431

| <b>Table 5. Frequency of NAT2 alleles.</b> |            |            |
|--------------------------------------------|------------|------------|
| <b>Allele</b>                              | <b>n</b>   | <b>%</b>   |
| NAT2*4                                     | 1          | 0.4        |
| NAT2*5C                                    | 51         | 21.3       |
| NAT2*5D                                    | 35         | 14.6       |
| NAT2*5E                                    | 10         | 4.2        |
| NAT2*5J                                    | 42         | 17.5       |
| NAT2*5K                                    | 25         | 10.4       |
| NAT2*5KA                                   | 2          | 0.8        |
| NAT2*5T                                    | 4          | 1.7        |
| NAT2*11A                                   | 3          | 1.3        |
| NAT2*12A                                   | 14         | 5.8        |
| NAT2*12C                                   | 51         | 21.2       |
| NAT2*12M                                   | 2          | 0.8        |
| <b>Total</b>                               | <b>240</b> | <b>100</b> |

432

433

| <b>Table 6: Frequency distribution of NAT2 genotypes and deduced phenotype in the study group.</b> |            |            |                          |
|----------------------------------------------------------------------------------------------------|------------|------------|--------------------------|
| <b>Genotype</b>                                                                                    | <b>n</b>   | <b>%</b>   | <b>Acetylator status</b> |
| NAT2*4/*11                                                                                         | 1          | 0.8        |                          |
| NAT2*12/*12                                                                                        | 11         | 9.2        | RAPID                    |
| Nat2*11/*12                                                                                        | 2          | 1.7        |                          |
| NAT2*5/*12                                                                                         | 43         | 35.8       | INTERMEDIATE             |
| NAT2*5/*5                                                                                          | 63         | 52.5       | SLOW                     |
| <b>Total</b>                                                                                       | <b>120</b> | <b>100</b> |                          |

434

435

436 **Table 7: Overall isoniazid and N-acetyl-isoniazid PK**

|                                                                                                                                                                                                                                                 | Study 1               |                      | Study 2               |                      |
|-------------------------------------------------------------------------------------------------------------------------------------------------------------------------------------------------------------------------------------------------|-----------------------|----------------------|-----------------------|----------------------|
|                                                                                                                                                                                                                                                 | Isoniazid             | N-acetylisoniazid    | Isoniazid             | N-acetylisoniazid    |
| AUC <sub>0-∞</sub> (µg/mL/hr)                                                                                                                                                                                                                   | 5.53 (3.63 – 9.12)    | 5.49 (3.18 – 9.26)   | 10.76 (8.24 – 28.96)  | 27.67 (23.20 -34.67) |
| C <sub>max</sub> (µg/mL)                                                                                                                                                                                                                        | 1.47 (1.14 – 1.89)    | 0.90 (0.46 – 1.398)  | 3.14 (2.39 – 4.34)    | 2.91 (1.73 – 3.70)   |
| T <sub>max</sub> (hr)                                                                                                                                                                                                                           | 1 (1 – 2)             | 4 (2 – 6)            | 2 (2 - 2)             | 3 (3 – 4)            |
| CL/F (L/hr)                                                                                                                                                                                                                                     | 47.64 (35.36 – 74.11) | NA                   | 27.34 (10.83 – 32.00) | NA                   |
| t <sub>1/2</sub> (hr)                                                                                                                                                                                                                           | 4.61 (3.64 – 8.32)    | 10.64 (6.62 – 17.07) | 6.02 (5.37 – 8.66)    | 8.03 (6.18 – 12.86)  |
| All values medians (inter-quartile ranges)<br>AUC <sub>0-∞</sub> = Area under the time – concentration curve<br>C <sub>max</sub> = Maximum concentration<br>CL/F = Clearance<br>t <sub>1/2</sub> = Elimination half life<br>NA = not applicable |                       |                      |                       |                      |

437

438 **Table 8 (A): Study 1 PK parameters by genotype**

|                                                                                                                                                                                                                                                 | Isoniazid              |                       |                       | N-acetyl-Isoniazid  |                     |                       |
|-------------------------------------------------------------------------------------------------------------------------------------------------------------------------------------------------------------------------------------------------|------------------------|-----------------------|-----------------------|---------------------|---------------------|-----------------------|
|                                                                                                                                                                                                                                                 | Slow                   | Intermediate          | Rapid                 | Slow                | Intermediate        | Rapid                 |
| AUC <sub>0-∞</sub> (µg/mL/hr)                                                                                                                                                                                                                   | 5.34 (3.44 – 7.93)     | 6.04 (4.27 – 7.53)    | 7.56 (5.99 -9.60)     | 5.71 (4.19 – 11.01) | 7.34 (3.15 – 10.9)  | 2.81 (0.55 – 5.06)    |
| C <sub>max</sub> (µg/mL)                                                                                                                                                                                                                        | 1.47 (0.97 – 1.89)     | 1.54 (1.25 – 1.76)    | 1.42 (1.20 -2.05)     | 0.94 (0.63 – 1.68)  | 1.07 (0.49 – 1.70)  | 0.38 (0.90 – 0.90)    |
| T <sub>max</sub> (hr)                                                                                                                                                                                                                           | 1 (1 -2)               | 1 (1 – 2)             | 2 (2 – 2)             | 4 (2 – 4)           | 4 (4 – 7)           | 6 (4 -6)              |
| CL/F (L/hr)                                                                                                                                                                                                                                     | 57.05 (37.84 – 103.56) | 43.53 (32.05 – 64.33) | 37.75 (31.27 – 47.92) | NA                  | NA                  | NA                    |
| t <sub>1/2</sub> (hr)                                                                                                                                                                                                                           | 4.67 (3.64 – 8.32)     | 4.00 (3.35 – 5.19)    | 8.56 (5.69 – 14.44)   | 9.42 (5.75 – 17.07) | 6.55 (6.68 – 10.93) | 14.78 (10.65 – 22.41) |
| All values medians (inter-quartile ranges)<br>AUC <sub>0-∞</sub> = Area under the time – concentration curve<br>C <sub>max</sub> = Maximum concentration<br>CL/F = Clearance<br>t <sub>1/2</sub> = Elimination half life<br>NA = not applicable |                        |                       |                       |                     |                     |                       |

439

440 **Table 8 (B): Study 2 PK parameters by genotype**

|                               | Isoniazid           |                       |       | N-acetyl-Isoniazid   |                    |       |
|-------------------------------|---------------------|-----------------------|-------|----------------------|--------------------|-------|
|                               | Slow                | Intermediate          | Rapid | Slow                 | Intermediate       | Rapid |
| AUC <sub>0-∞</sub> (µg/mL/hr) | 10.76 (9.73 -31.21) | 9.09 (7.3 -18.75)     | 26.99 | 26.04 (22.99 -32.76) | 6.28 (5.25 -10.01) | 28.53 |
| C <sub>max</sub> (µg/mL)      | 3.47 (2.49 - 4.49)  | 2.96 (2.33 - 4.02)    | 3.94  | 2.85 (1.52 - 3.68)   | 3.28 (2.53 - 4.01) | 1.91  |
| T <sub>max</sub> (hr)         | 2 (2 - 2)           | 2 (2 - 2)             | 2     | 3 (3-4)              | 3 (3 - 3)          | 4     |
| CL/F (L/hr)                   | 27.87 (9.66 -30.83) | 33.33 (16.01 - 41.17) | 11.12 | NA                   | NA                 | NA    |
| t <sub>1/2</sub> (hr)         | 4.61 (3.9 -5.34)    | 4.46 (3.9 - 7.88)     | 8.28  | 5.81 (4.9 - 7.25)    | 6.28 (5.25 -10.01) | 10.97 |

All values medians (inter-quartile ranges)

AUC<sub>0-∞</sub> = Area under the time – concentration curve

C<sub>max</sub> = Maximum concentration

CL/F = Clearance

t<sub>1/2</sub> = Elimination half life

NA = not applicable

441

442

443

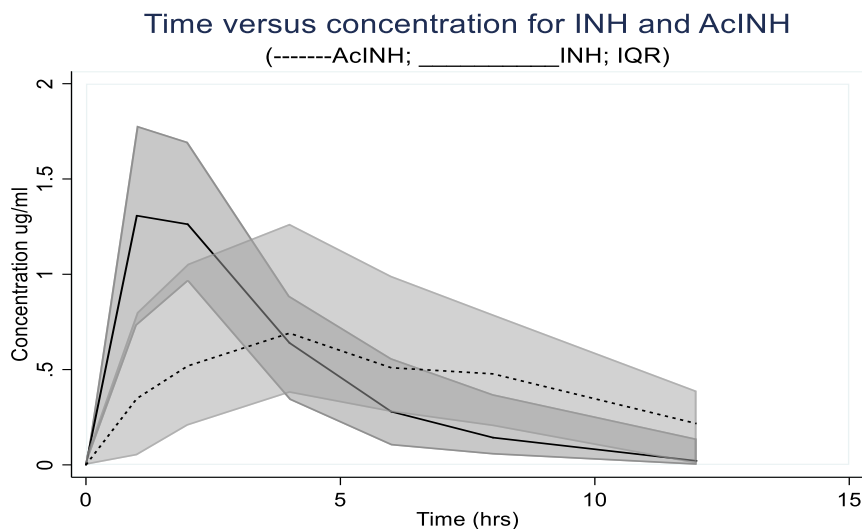

444

445 Figure 1A: Study 1 median INH and AcINH concentration over time for INH and AcINH for 58  
446 patients. Shaded area; IQR.

447

448

449

450

451

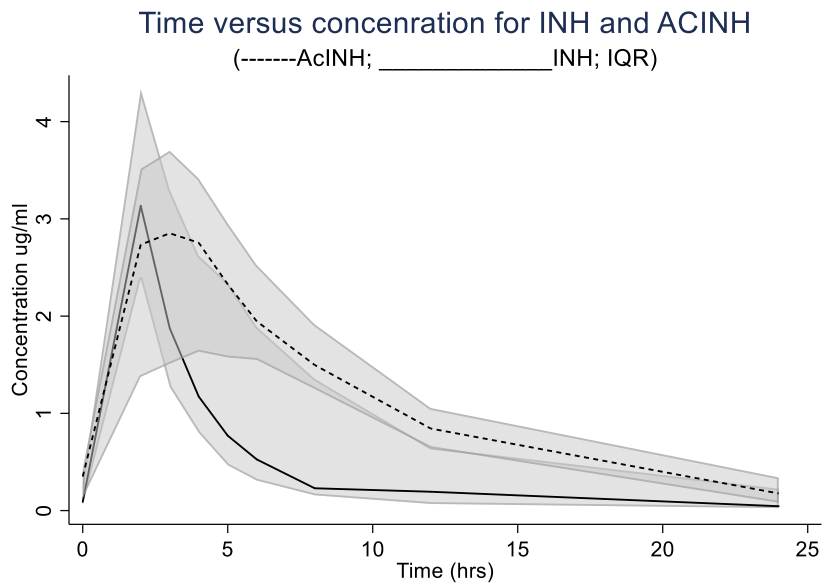

452  
453

454 Figure 1B: Study 2 median INH and AcINH concentration over time for INH and NA-INH for 34  
455 patients. Shaded area: IQR.

456  
457

458  
459  
460  
461  
462

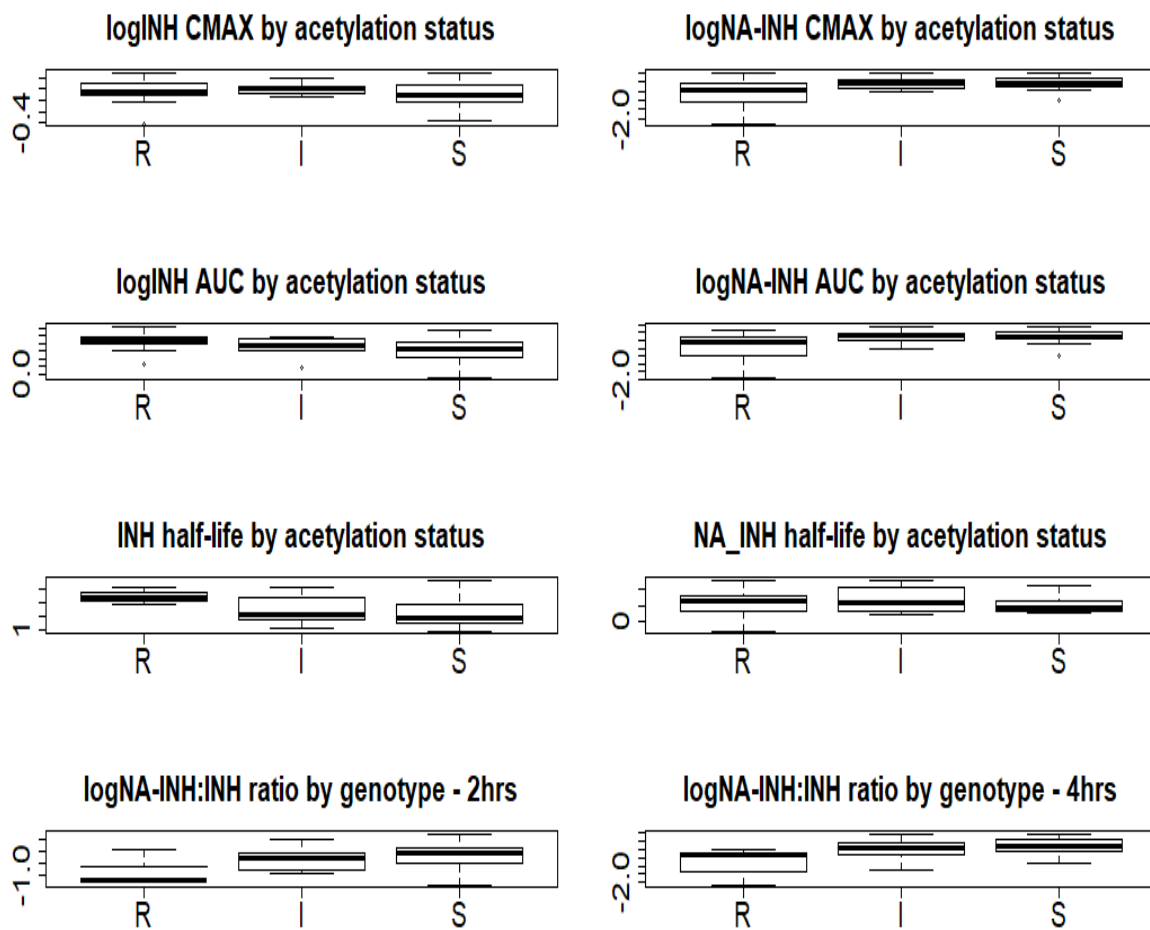

463  
464  
465  
466  
467  
468  
469

Figure 2: Box plots for study 1: representing median (solid line), interquartile range (box) and range (whiskers) for the pharmacokinetic parameters; log<sub>10</sub> maximum concentration (C<sub>max</sub>), log<sub>10</sub> area under the time-concentration curve (AUC<sub>0-∞</sub>), of isoniazid (INH) and *N*-acetyl-INH (AcINH) stratified by acetylator status and logAcINH to logINH ratio at 2 and 4 hours stratified by acetylator genotype.

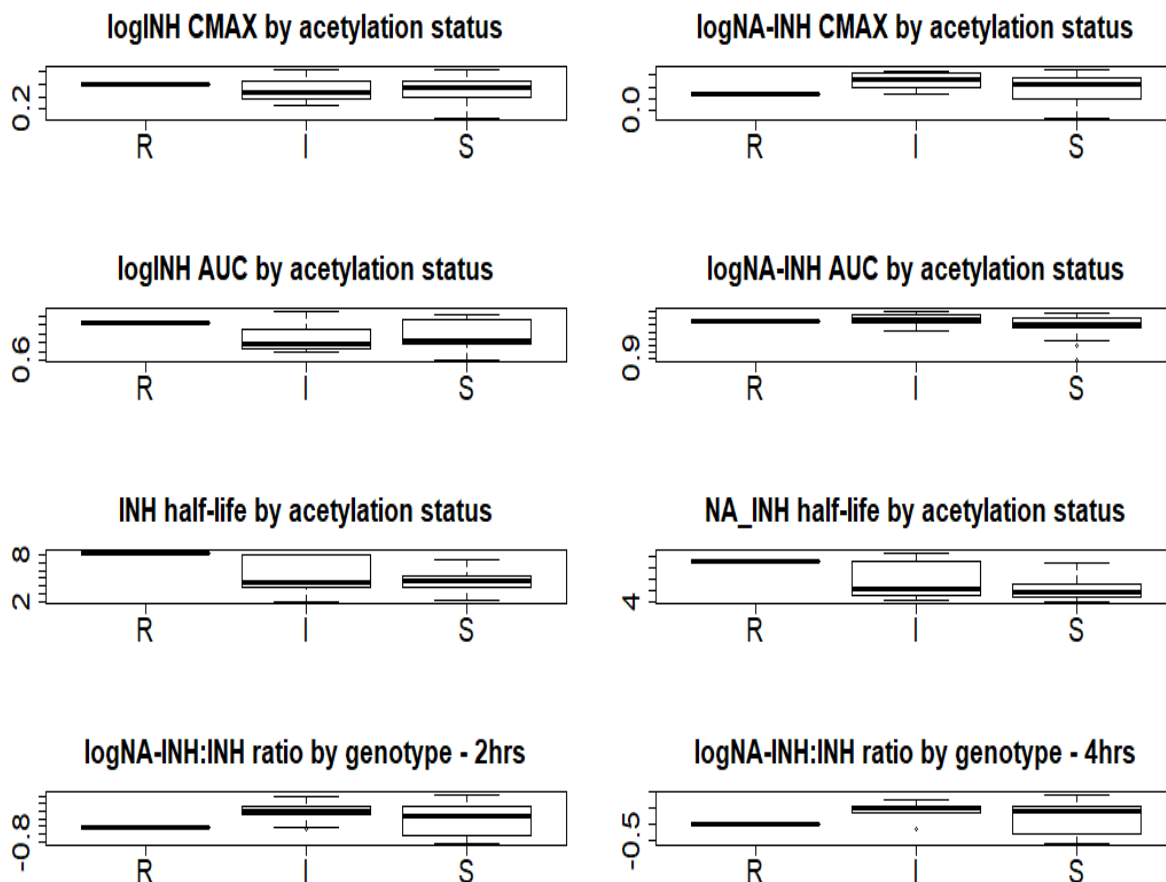

470  
471 Figure 3: Box plots for study 2: representing median (solid line), interquartile range (box)  
472 and range (whiskers) for the pharmacokinetic parameters;  $\log_{10}$  maximum concentration  
473 ( $C_{max}$ ),  $\log_{10}$  area under the time-concentration curve ( $AUC_{0-\infty}$ ), of isoniazid (INH) and *N*-  
474 acetyl-INH (AcINH) stratified by acetylator status and  $\log$ AcINH to  $\log$ INH ratio at 2 and 4  
475 hours stratified by acetylator genotype.

476  
477 Table 9: Participants with any hepatic adverse events

| AE Grade     | Study 1         |                   |                | Total N(%)      | Study 2       |                   |                 | Total N(%)     |
|--------------|-----------------|-------------------|----------------|-----------------|---------------|-------------------|-----------------|----------------|
|              | Rapid N(%)      | Intermediate N(%) | Slow N(%)      |                 | Rapid N(%)    | Intermediate N(%) | Slow N(%)       |                |
| Grade 1      | 7               | 9                 | 25             | <b>41</b>       | 0             | 5                 | 10              | <b>15</b>      |
| Grade 2      | 2               | 0                 | 0              | <b>2</b>        | 0             | 1                 | 1               | <b>2</b>       |
| Grade 3      | 0               | 0                 | 0              | <b>0</b>        | 0             | 2                 | 1               | <b>3</b>       |
| Grade 4      | 0               | 0                 | 0              | <b>0</b>        | 1             | 0                 | 0               | <b>1</b>       |
| <b>Total</b> | <b>9 (20.9)</b> | <b>9 (20.9)</b>   | <b>25 (61)</b> | <b>43 (100)</b> | <b>1(4.8)</b> | <b>8(30.1)</b>    | <b>12(57.1)</b> | <b>21(100)</b> |

478  
479  
480



481  
482  
483  
484  
485  
486  
487  
488  
489  
490  
491  
492

Hepatic adverse events from the two studies include a combination of elevated Aspartate Aminotransferase (AST), Alanine Aminotransferase (ALT), Alkaline Phosphatase (ALP), Gamma-Glutamyl Transferase and total bilirubin.

493

494 **References**

- 495 1. WHO. 2019. Global Tuberculosis Report.
- 496 2. Chideya S, Winston CA, Peloquin CA, Bradford WZ, Hopewell PC, Wells CD, Reingold  
497 AL, Kenyon TA, Moeti TL, Tappero JW. 2009. Isoniazid, rifampin, ethambutol, and  
498 pyrazinamide pharmacokinetics and treatment outcomes among a predominantly HIV-  
499 infected cohort of adults with tuberculosis from Botswana. *Clin Infect Dis* 48:1685-94.
- 500 3. Pasipanodya JG, McIlleron H, Burger A, Wash PA, Smith P, Gumbo T. 2013. Serum  
501 drug concentrations predictive of pulmonary tuberculosis outcomes. *J Infect Dis*  
502 208:1464-73.
- 503 4. Lauterburg BH, Smith CV, Todd EL, Mitchell JR. 1985. Pharmacokinetics of the toxic  
504 hydrazino metabolites formed from isoniazid in humans. *J Pharmacol Exp Ther* 235:566-  
505 70.
- 506 5. Ryan DE, Ramanathan L, Iida S, Thomas PE, Haniu M, Shively JE, Lieber CS, Levin W.  
507 1985. Characterization of a major form of rat hepatic microsomal cytochrome P-450  
508 induced by isoniazid. *J Biol Chem* 260:6385-93.
- 509 6. Ellard GA, Gammon PT. 1976. Pharmacokinetics of isoniazid metabolism in man. *J*  
510 *Pharmacokinet Biopharm* 4:83-113.
- 511 7. Timbrell JA, Wright JM, Baillie TA. 1977. Monoacetylhydrazine as a metabolite of  
512 isoniazid in man. *Clin Pharmacol Ther* 22:602-8.
- 513 8. Kinzig-Schippers M, Tomalik-Scharte D, Jetter A, Scheidel B, Jakob V, Rodamer M,  
514 Cascorbi I, Doroshenko O, Sorgel F, Fuhr U. 2005. Should we use N-acetyltransferase  
515 type 2 genotyping to personalize isoniazid doses? *Antimicrob Agents Chemother*  
516 49:1733-8.
- 517 9. Evans DA, Manley KA, Mc KV. 1960. Genetic control of isoniazid metabolism in man.  
518 *Br Med J* 2:485-91.
- 519 10. Blum M, Demierre A, Grant DM, Heim M, Meyer UA. 1991. Molecular mechanism of  
520 slow acetylation of drugs and carcinogens in humans. *Proc Natl Acad Sci U S A* 88:5237-  
521 41.
- 522 11. Deguchi T, Mashimo M, Suzuki T. 1990. Correlation between acetylator phenotypes and  
523 genotypes of polymorphic arylamine N-acetyltransferase in human liver. *J Biol Chem*  
524 265:12757-60.
- 525 12. Parkin DP, Vandenplas S, Botha FJ, Vandenplas ML, Seifart HI, van Helden PD, van der  
526 Walt BJ, Donald PR, van Jaarsveld PP. 1997. Trimodality of isoniazid elimination:  
527 phenotype and genotype in patients with tuberculosis. *Am J Respir Crit Care Med*  
528 155:1717-22.
- 529 13. Mashimo M, Suzuki T, Abe M, Deguchi T. 1992. Molecular genotyping of N-acetylation  
530 polymorphism to predict phenotype. *Hum Genet* 90:139-43.
- 531 14. Huang YS, Chern HD, Su WJ, Wu JC, Lai SL, Yang SY, Chang FY, Lee SD. 2002.  
532 Polymorphism of the N-acetyltransferase 2 gene as a susceptibility risk factor for  
533 antituberculosis drug-induced hepatitis. *Hepatology* 35:883-9.
- 534 15. Ohno M, Yamaguchi I, Yamamoto I, Fukuda T, Yokota S, Maekura R, Ito M, Yamamoto  
535 Y, Ogura T, Maeda K, Komuta K, Igarashi T, Azuma J. 2000. Slow N-acetyltransferase 2  
536 genotype affects the incidence of isoniazid and rifampicin-induced hepatotoxicity. *Int J*  
537 *Tuberc Lung Dis* 4:256-61.

- 538 16. Wang PY, Xie SY, Hao Q, Zhang C, Jiang BF. 2012. NAT2 polymorphisms and  
539 susceptibility to anti-tuberculosis drug-induced liver injury: a meta-analysis. *Int J Tuberc*  
540 *Lung Dis* 16:589-95.
- 541 17. Drayer DE, Reidenberg MM. 1977. Clinical consequences of polymorphic acetylation of  
542 basic drugs. *Clin Pharmacol Ther* 22:251-8.
- 543 18. Garibaldi RA, Drusin RE, Ferebee SH, Gregg MB. 1972. Isoniazid-associated hepatitis.  
544 Report of an outbreak. *Am Rev Respir Dis* 106:357-65.
- 545 19. Mitchell JR, Zimmerman HJ, Ishak KG, Thorgeirsson UP, Timbrell JA, Snodgrass WR,  
546 Nelson SD. 1976. Isoniazid liver injury: clinical spectrum, pathology, and probable  
547 pathogenesis. *Ann Intern Med* 84:181-92.
- 548 20. Warrington RJ, Tse KS, Gorski BA, Schwenk R, Sehon AH. 1978. Evaluation of  
549 isoniazid-associated hepatitis by immunological tests. *Clin Exp Immunol* 32:97-104.
- 550 21. Ellard GA, Gammon PT. 1977. Acetylator phenotyping of tuberculosis patients using  
551 matrix isoniazid or sulphadimidine and its prognostic significance for treatment with  
552 several intermittent isoniazid-containing regimens. *Br J Clin Pharmacol* 4:5-14.
- 553 22. Evans DA. 1964. Enzymes and Drug Sensitivity. Acetylation Polymorphisms. *Proc R*  
554 *Soc Med* 57:508-11.
- 555 23. Sirgel FA, Fourie PB, Donald PR, Padayatchi N, Rustomjee R, Levin J, Roscigno G,  
556 Norman J, McIlleron H, Mitchison DA. 2005. The early bactericidal activities of rifampin  
557 and rifapentine in pulmonary tuberculosis. *Am J Respir Crit Care Med* 172:128-35.
- 558 24. Donald PR, Sirgel FA, Botha FJ, Seifart HI, Parkin DP, Vandenplas ML, Van de Wal  
559 BW, Maritz JS, Mitchison DA. 1997. The early bactericidal activity of isoniazid related  
560 to its dose size in pulmonary tuberculosis. *Am J Respir Crit Care Med* 156:895-900.
- 561 25. Donald PR, Parkin DP, Seifart HI, Schaaf HS, van Helden PD, Werely CJ, Sirgel FA,  
562 Venter A, Maritz JS. 2007. The influence of dose and N-acetyltransferase-2 (NAT2)  
563 genotype and phenotype on the pharmacokinetics and pharmacodynamics of isoniazid.  
564 *Eur J Clin Pharmacol* 63:633-9.
- 565 26. Chigutsa E, Pasipanodya JG, Visser ME, van Helden PD, Smith PJ, Sirgel FA, Gumbo T,  
566 McIlleron H. 2015. Impact of nonlinear interactions of pharmacokinetics and MICs on  
567 sputum bacillary kill rates as a marker of sterilizing effect in tuberculosis. *Antimicrob*  
568 *Agents Chemother* 59:38-45.
- 569 27. Pasipanodya J, Gumbo T. 2011. An oracle: antituberculosis pharmacokinetics-  
570 pharmacodynamics, clinical correlation, and clinical trial simulations to predict the  
571 future. *Antimicrob Agents Chemother* 55:24-34.
- 572 28. Pasipanodya JG, Srivastava S, Gumbo T. 2012. Meta-Analysis of Clinical Studies  
573 Supports the Pharmacokinetic Variability Hypothesis for Acquired Drug Resistance and  
574 Failure of Antituberculosis Therapy. *Clinical Infectious Diseases* 55:169-177.
- 575 29. Azuma J, Ohno M, Kubota R, Yokota S, Nagai T, Tsuyuguchi K, Okuda Y, Takashima  
576 T, Kamimura S, Fujio Y, Kawase I, Pharmacogenetics-based tuberculosis therapy  
577 research g. 2013. NAT2 genotype guided regimen reduces isoniazid-induced liver injury  
578 and early treatment failure in the 6-month four-drug standard treatment of tuberculosis: a  
579 randomized controlled trial for pharmacogenetics-based therapy. *Eur J Clin Pharmacol*  
580 69:1091-101.
- 581 30. Cascorbi I, Drakoulis N, Brockmoller J, Maurer A, Sperling K, Roots I. 1995. Arylamine  
582 N-acetyltransferase (NAT2) mutations and their allelic linkage in unrelated Caucasian  
583 individuals: correlation with phenotypic activity. *Am J Hum Genet* 57:581-92.

- 584 31. Agundez JA, Martinez C, Olivera M, Ledesma MC, Ladero JM, Benitez J. 1994.  
585 Molecular analysis of the arylamine N-acetyltransferase polymorphism in a Spanish  
586 population. *Clin Pharmacol Ther* 56:202-9.
- 587 32. Lin HJ, Han CY, Lin BK, Hardy S. 1994. Ethnic distribution of slow acetylator mutations  
588 in the polymorphic N-acetyltransferase (NAT2) gene. *Pharmacogenetics* 4:125-34.
- 589 33. Walker K, Ginsberg G, Hattis D, Johns DO, Guyton KZ, Sonawane B. 2009. Genetic  
590 polymorphism in N-Acetyltransferase (NAT): Population distribution of NAT1 and  
591 NAT2 activity. *J Toxicol Environ Health B Crit Rev* 12:440-72.
- 592 34. Hein DW, Fretland AJ, Doll MA. 2006. Effects of single nucleotide polymorphisms in  
593 human N-acetyltransferase 2 on metabolic activation (O-acetylation) of heterocyclic  
594 amine carcinogens. *Int J Cancer* 119:1208-11.
- 595 35. Sabbagh A, Langaney A, Darlu P, Gerard N, Krishnamoorthy R, Poloni ES. 2008.  
596 Worldwide distribution of NAT2 diversity: implications for NAT2 evolutionary history.  
597 *BMC Genet* 9:21.
- 598 36. Patin E, Barreiro LB, Sabeti PC, Austerlitz F, Luca F, Sajantila A, Behar DM, Semino O,  
599 Sakuntabhai A, Guiso N, Gicquel B, McElreavey K, Harding RM, Heyer E, Quintana-  
600 Murci L. 2006. Deciphering the ancient and complex evolutionary history of human  
601 arylamine N-acetyltransferase genes. *Am J Hum Genet* 78:423-36.
- 602 37. Smith CA, Wadelius M, Gough AC, Harrison DJ, Wolf CR, Rane A. 1997. A simplified  
603 assay for the arylamine N-acetyltransferase 2 polymorphism validated by phenotyping  
604 with isoniazid. *J Med Genet* 34:758-60.
- 605 38. Evans DA. 1968. Genetic variations in the acetylation of isoniazid and other drugs. *Ann*  
606 *N Y Acad Sci* 151:723-33.
- 607 39. Hein DW, Ferguson RJ, Doll MA, Rustan TD, Gray K. 1994. Molecular genetics of  
608 human polymorphic N-acetyltransferase: enzymatic analysis of 15 recombinant wild-  
609 type, mutant, and chimeric NAT2 allozymes. *Hum Mol Genet* 3:729-34.
- 610 40. Hein DW, Doll MA. 2012. Accuracy of various human NAT2 SNP genotyping panels to  
611 infer rapid, intermediate and slow acetylator phenotypes. *Pharmacogenomics* 13:31-41.
- 612 41. Singh N, Dubey S, Chinnaraj S, Golani A, Maitra A. 2009. Study of NAT2 gene  
613 polymorphisms in an Indian population: association with plasma isoniazid concentration  
614 in a cohort of tuberculosis patients. *Mol Diagn Ther* 13:49-58.
- 615 42. Lakkakula S, Mohan Pathapati R, Chaubey G, Munirajan AK, Lakkakula BVKS, Maram  
616 R. 2014. NAT2 genetic variations among South Indian populations. *Human Genome*  
617 *Variation* 1:14014.
- 618 43. Patin E, Harmant C, Kidd KK, Kidd J, Froment A, Mehdi SQ, Sica L, Heyer E,  
619 Quintana-Murci L. 2006. Sub-Saharan African coding sequence variation and haplotype  
620 diversity at the NAT2 gene. *Hum Mutat* 27:720.
- 621 44. Bach PH, Higgins-Opitz SB, Bima B, Leary WP. 1976. Isoniazid acetylator status of  
622 Black South African tuberculosis patients. *S Afr Med J* 50:1132-4.
- 623 45. Werely CJ. 2012. *Pharmacogenetics of Arylamine N-acetyltransferase genes in South*  
624 *African populations Stellenbosch: Stellenbosch University.*
- 625 46. O'Neil WM, Drobitch RK, MacArthur RD, Farrough MJ, Doll MA, Fretland AJ, Hein  
626 DW, Crane LR, Svensson CK. 2000. Acetylator phenotype and genotype in patients  
627 infected with HIV: discordance between methods for phenotype determination and  
628 genotype. *Pharmacogenetics* 10:171-82.

- 629 47. Kaufmann GR, Wenk M, Taeschner W, Peterli B, Gyr K, Meyer UA, Haefeli WE. 1996.  
630 N-acetyltransferase 2 polymorphism in patients infected with human immunodeficiency  
631 virus. *Clin Pharmacol Ther* 60:62-7.
- 632 48. Naiker S, Connolly C, Wiesner L, Kellerman T, Reddy T, Harries A, McIlleron H,  
633 Lienhardt C, Pym A. 2014. Randomized pharmacokinetic evaluation of different rifabutin  
634 doses in African HIV-infected tuberculosis patients on lopinavir/ritonavir-based  
635 antiretroviral therapy. *BMC Pharmacology and Toxicology* 15:61.
- 636 49. McIlleron H, Rustomjee R, Vahedi M, Mthiyane T, Denti P, Connolly C, Rida W, Pym  
637 A, Smith PJ, Onyebujoh PC. 2012. Reduced antituberculosis drug concentrations in HIV-  
638 infected patients who are men or have low weight: implications for international dosing  
639 guidelines. *Antimicrob Agents Chemother* 56:3232-8.
- 640 50. WHO. 2010. Treatment of Tuberculosis: Guidelines-4th edition. World Health  
641 Organisation, Geneva, Switzerland Geneva (2010).
- 642 51. Hennig S, Naiker S, Reddy T, Egan D, Kellerman T, Wiesner L, Owen A, McIlleron H,  
643 Pym A. 2015. Effect of SLCO1B1 Polymorphisms on Rifabutin Pharmacokinetics in  
644 African HIV-Infected Patients with Tuberculosis. *Antimicrobial agents and  
645 chemotherapy* 60:617-620.
- 646 52. Naiker S, Connolly C, Wiesner L, Kellerman T, Reddy T, Harries A, McIlleron H,  
647 Lienhardt C, Pym A. 2014. Randomized pharmacokinetic evaluation of different rifabutin  
648 doses in African HIV- infected tuberculosis patients on lopinavir/ritonavir-based  
649 antiretroviral therapy. *BMC Pharmacol Toxicol* 15:61.
- 650 53. Stephens M, Donnelly P. 2003. A comparison of bayesian methods for haplotype  
651 reconstruction from population genotype data. *Am J Hum Genet* 73:1162-9.
- 652 54. Stephens M, Smith NJ, Donnelly P. 2001. A new statistical method for haplotype  
653 reconstruction from population data. *Am J Hum Genet* 68:978-89.
- 654 55. Human N. Alleles (Haplotypes) [http://nat.mbg.duth.gr/Human% 20NAT2%](http://nat.mbg.duth.gr/Human%20NAT2%20alleles_2013.htm)  
655 [20alleles\\_2013 htm.](http://nat.mbg.duth.gr/Human%20NAT2%20alleles_2013.htm)
- 656 56. Alsultan A, Peloquin CA. 2014. Therapeutic drug monitoring in the treatment of  
657 tuberculosis: an update. *Drugs* 74:839-54.
- 658 57. Sirugo G, Hennig BJ, Adeyemo AA, Matimba A, Newport MJ, Ibrahim ME, Ryckman  
659 KK, Tacconelli A, Mariani-Costantini R, Novelli G, Soodyall H, Rotimi CN, Ramesar  
660 RS, Tishkoff SA, Williams SM. 2008. Genetic studies of African populations: an  
661 overview on disease susceptibility and response to vaccines and therapeutics. *Hum Genet*  
662 123:557-98.
- 663 58. Deloménie C, Sica L, Grant DM, Krishnamoorthy R, Dupret J-M. 1996. Genotyping of  
664 the polymorphic N-acetyltransferase (NAT2\*) gene locus in two native African  
665 populations. *Pharmacogenetics and Genomics* 6:177-185.
- 666 59. Naidoo A, Chirehwa M, Ramsuran V, McIlleron H, Naidoo K, Yende-Zuma N, Singh R,  
667 Ncgapu S, Adamson J, Govender K, Denti P, Padayatchi N. Effects of genetic variability  
668 on rifampicin and isoniazid pharmacokinetics in South African patients with recurrent  
669 tuberculosis. *Pharmacogenomics* 0:null.
- 670 60. Loktionov A, Moore W, Spencer SP, Vorster H, Nell T, O'Neill IK, Bingham SA,  
671 Cummings JH. 2002. Differences in N-acetylation genotypes between Caucasians and  
672 Black South Africans: implications for cancer prevention. *Cancer Detect Prev* 26:15-22.
- 673 61. Dandara C, Masimirembwa CM, Magimba A, Kaaya S, Sayi J, Sommers DK, Snyman  
674 JR, Hasler JA. 2003. Arylamine N-acetyltransferase (NAT2) genotypes in Africans: the

- 675 identification of a new allele with nucleotide changes 481C>T and 590G>A.  
676 Pharmacogenetics 13:55-8.
- 677 62. Klein DJ, Boukouvala S, McDonagh EM, Shuldiner SR, Laurieri N, Thorn CF, Altman  
678 RB, Klein TE. 2016. PharmGKB Summary: Isoniazid Pathway, Pharmacokinetics (PK).  
679 Pharmacogenetics and genomics 26:436.
- 680 63. Alfirevic A, Stalford AC, Vilar FJ, Wilkins EG, Park BK, Pirmohamed M. 2003. Slow  
681 acetylator phenotype and genotype in HIV-positive patients with sulphamethoxazole  
682 hypersensitivity. Br J Clin Pharmacol 55:158-65.
- 683 64. O'Neil WM, MacArthur RD, Farrough MJ, Doll MA, Fretland AJ, Hein DW, Crane LR,  
684 Svensson CK. 2002. Acetylator phenotype and genotype in HIV-infected patients with  
685 and without sulfonamide hypersensitivity. J Clin Pharmacol 42:613-9.
- 686 65. Jones AE, Brown KC, Werner RE, Gotzkowsky K, Gaedigk A, Blake M, Hein DW, van  
687 der Horst C, Kashuba AD. 2010. Variability in drug metabolizing enzyme activity in  
688 HIV-infected patients. Eur J Clin Pharmacol 66:475-85.
- 689 66. Yew W. 2002. Clinically significant interactions with drugs used in the treatment of  
690 tuberculosis. Drug safety 25:111-113.
- 691 67. Holdiness MR. 1984. Clinical pharmacokinetics of the antituberculosis drugs. Clinical  
692 pharmacokinetics 9:511-544.
- 693 68. Blaschke TF, Skinner MH. 1996. The clinical pharmacokinetics of rifabutin. Clinical  
694 Infectious Diseases 22:S15-S22.
- 695 69. Hutchings A, Monie RD, Spragg B, Routledge PA. 1983. A method to prevent the loss of  
696 isoniazid and acetylisoniazid in human plasma. Br J Clin Pharmacol 15:263-6.  
697  
698

699  
700
